# Supplementary material for: Long-lasting redundant gnrh1/3 expression in GnRH neurons enabled apparent switching of paralog usage during evolution
Source: PubMed Central journal article supplement (PMC10924128; doi:10.1016/j.isci.2024.109304), 2024-02-22
Supplement: mmc1.pdf [file mmc1.pdf]

iScience, Volume 27

## Supplemental information

### Long-lasting redundant *gnrh1/3* expression in GnRH neurons enabled apparent switching of paralog usage during evolution

Chika Fujimori, Kohei Sugimoto, Mio Ishida, Christopher Yang, Daichi Kayo, Soma Tomihara, Kaori Sano, Yasuhisa Akazome, Yoshitaka Oka, and Shinji Kanda

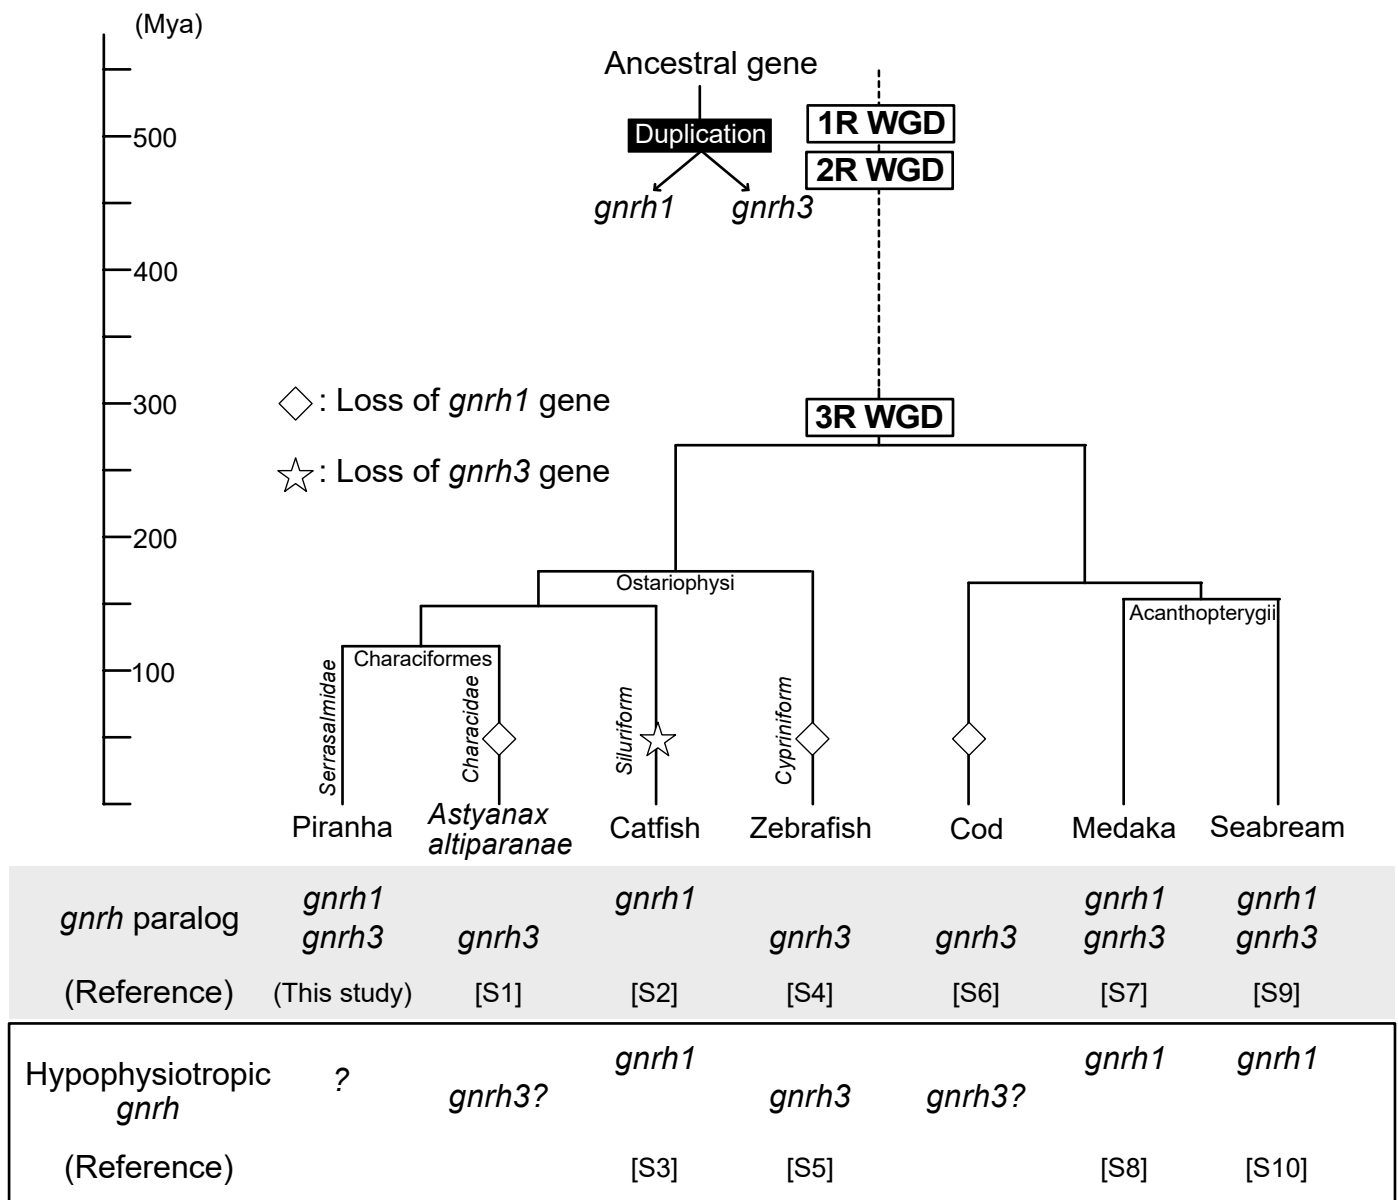

**Figure S1. Phylogenetic tree of teleost species and their hypophysiotropic GnRH paralogs, related to introduction and Figure 5.**

The *gnrh1* and *gnrh3* genes were arisen from an ancestral gene during the first/second-round (1R/2R) whole genome duplication (WGD), which occurred ~550 million years ago (Mya). Many teleost species have hypophysiotropic GnRH1 neurons as the main regulator of gonadotropin release in Acanthopterygii. However, in Cypriniform and Characidae species as well as Atlantic cod, *gnrh1* has been lost and *gnrh3* is expressed in hypophysiotropic GnRH neurons instead. Since three forms of GnRH peptide are expressed in a Serrasalmidae species, pacu, we expected species in this group, including piranha, may have both *gnrh1* and *gnrh3*.

(A)

```

1  GGTCAAACCTGAAACCAGAACGGTGACGAGAAGCAGAAGCTTTCACTGGTCAGCTAAAGGATGAAGACAAGCAGTGCT 80
      CR1          CR2          CR3          M K T S S A
81  CTCTTGTGGGTGATGATTTGTGTTGTGGTGTGCAGGTGCACTGTGCACTGGTCATATGGCCTGAGCCCTGGAGGTAG 160
      L L W V M I C V V V L Q V H C Q H W S Y G L S P G G R
161 GCGTGCAGCGGAGAGCCTGACAGGCACTTTTCAGGCGGCTGCATATTTACCCAGGAAGGGCCCGGCCAGCTACATGTGTG 240
      R A A E S L T G T F Q A A A Y L P R K G P A S Y M C
241 ATTATGTGGATTTGTCCCCTGTAATAAACTGTCAAACCTCAAAGAAGTGTGGACAGTCTTGCTGACGCCGAAAGCTGA 320
      D Y V D L S P R N K L S K L K E L L D S L A D A E S *
321 AAGTGACCACGCAGTACCTGACCAAGACACTTAATAAACTGTGCCTCAAAAAAAAAAAAAAAAAAAAAAAAAAAAA 396

```

(B)

```

1  GGTTCGGCAACATGACTAAAAGCGGAGCTGAGTGGAGCTGGCGGTGACGCTCGGGTTGTTGGTGTGGTTTGTGTGCTG 80
      M T K S G A E W S W R S A L G L L V L V C V L
81  GAGGTCAGTGTGTGTCAGCACTGGTCATACGGTTGGCTGCCTGGAGGAAAAAGGAGTGTGGAGAACTGGAGGCACTTT 160
      E V S V C Q H W S Y G W L P G G K R S V G E L E A T F
161 CCGAATGATGGACGCTGGTGTGCTGTTGTGGCTTTGCCCTGGAGTCTCCACTGCAGCAGATAACTCCGCTGCAAACCTA 240
      R M M D A G D A V V A L P L E S P L Q Q I T P L Q T
241 TGAATGAGGAAGACTCTGAAGCTCTTAAGAGGAAAATAATTTCTTCAGAAGACGAGGAAGAGCAGAATAACCTCACACT 320
      M N E E D S E A L K R K I I S F R R R G R A E *
321 CACTCTCTCAGTGTGAATCTGAATTAACCTTTTTATTCTCCATCAAAAAAAAAAAAAAAAAAAAAAAAAAAAA 399

```

(C)

```

1  GTGGTGGTGGGCTGCTGGTGTGGCTTGTGTGGTGGAGGTGGGTGTGTGTGTCAGCACTGGTCATATGGATGGATGCCTGG 80
      V V V G L L V L A C V V E V G V C Q H W S Y G W M P G
81  AGGGAAGAGGAGCGTGGGGAACTGGAAGCAACGTTTCAAGATGATGGACGCTGGAGACGCTGTTGTGGCTTTGCCITTA 160
      G K R S V G E L E A T F R M M D A G D A V V A L P L
161 ACTCTCCACTGCAGCAGATCACTCCCCTGCAGACTATAAATGAGGAAGATTCTGAAGCGCTAAAGTAGAAAAGAATCTAC 240
      N S P L Q Q I T P L Q T I N E E D S E A L K *
241 TACGAAGACAAAGGGGAGCGGAGTAAACACACACATATGCACATATTCTAAGTAGAAAAGCTAAATAAACTCTTCTAACT 320
321 CCAAAAAAAAAAAAAAAAAAAAAAAAAAAAA 355

```

(D) GnRH1

```

Piranha QHWSYGLSPGGRRAAESLTGTFQAAAYLPRKGPASYMCDYVDLSPRN---KLSKLELLDSLADAES*-----
Catfish QHWSHGLNPGGKRAVMQES-----AEEIIPRR--SGYLCDYVAVSPRN---KPFRLKDLLTPVAGREIEE*----
Medaka QHWSFGLSPGGKRELKYFPN--TLENQIR-LLNSNTPCSDLHLEESSLAKIYRIKGLLGSVTEAKNGYRTYK-
Seabream QHWSYGLSPGGKRDLSLSD--TLGNIIEERFPHVDSPCSVLGCVEEPHVPRMYRMKGFIG--SERDIGHRMYKK

```

(E) GnRH3

```

Piranha QHWSYGLWIPGGKRSVGELEATFRMMDAGDAVVALPLES---PLQQITPLQTMNEEDSEALKRKIIISFR-RRGRAE
Tetra QHWSYGLWIPGGKRSVGELEATFRMMDAGDAVVALPLNSPLQQITPLQTMNEEDSEALK-----
Zebrafish QHWSYGLWIPGGKRSVGELEATFRMLDLPDGLVLSIPADS---PMEQLSPIHIVNEVDAGLPLKQRYSDRRGRV-
Cod QHWSYGLWIPGGKRSVGELEATIRMMGTG-GEVPLMEDPRDPALERIRPYSLVND-EAVRFQKK-KRLLHD-----
Medaka QHWSYGLWIPGGKRSVGELEATIRMMGTG-RVVSLEPEDASAQTQERLRQYNLIND-GSTYFDRK-KRFMSQ-----
Seabream QHWSYGLWIPGGKRSVGELEATIRMMGTG-GVVSLEPEEASAQTQERLRPYNVIKD-DSSPFDRK-KRFPNK-----

```

**Figure S2. Alignment of piranha *gnrh1*, *gnrh3* and head-and-tail-light tetra *gnrh3*, related to Figure 1 and Figure 2.**

(A-C) Nucleotide sequence and deduced amino acid sequence of piranha *gnrh1* (A), *gnrh3* (B) and head-and-tail-light tetra *gnrh3* gene (C). Each box shows mature GnRH peptides. Three dotted boxes (CR1, CR2, CR3) in (A) represent gRNA sequences used for generation of *gnrh1* knockout (KO) piranha. Antigen sequence for antibody production is shaded in gray. Underlines show probe sequences for *in situ* hybridization. (D) Alignment of the deduced amino acid sequences of mature GnRH1 and GnRH-associated peptide (GAP1) in piranha with those in channel catfish (catfish), medaka and gilthead seabream (seabream). Mature GnRH1 sequence of piranha is identical to that of gilthead seabream. Conserved amino acids in all 4 species and 3 species are shaded black and gray, respectively. (E) Alignment of the deduced amino acid sequences of mature GnRH3 and GnRH-associated peptide (GAP3) in piranha and head-and-tail-light tetra with those in zebrafish, cod, medaka and gilthead seabream (seabream). Mature GnRH3 sequence of piranha is identical to those of all species aligned except for head-and-tail-light tetra (Tetra). Conserved amino acids in all 6 species and 4 species are shaded black and gray, respectively.

(A)

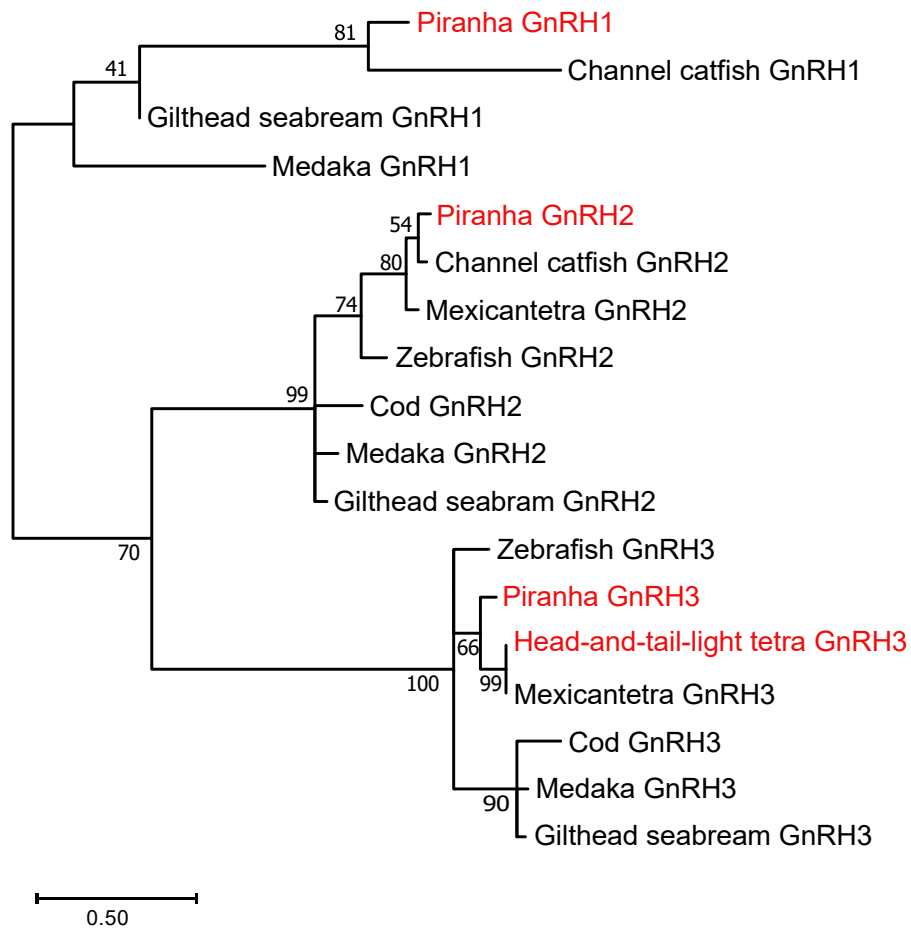

(B)

|               |                                   |
|---------------|-----------------------------------|
| Wild type     | TGTCAGCACTGGTCATATGGCCTGAGCCCTGGA |
|               | Q H W S Y G L S P G               |
| 1bp deletion  | TGTCAGCACTGGT-ATATGGCCTGAGCCCTGGA |
|               | Q H W Y M A *                     |
| 10bp deletion | TGTCA-----TATGGCCTGAGCCCTGGA      |
|               | H M A *                           |
| 9bp deletion  | TG-----GTCATATGGCCTGAGCCCTGGA     |
|               | W S Y G L S P G                   |

(C)

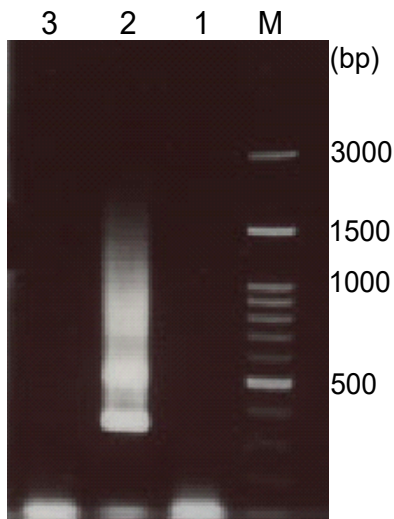

**Figure S3. Phylogenetic tree of *gnrh1* and *gnrh3*, information of the knockout, and a PCR result, related to Figure 1 and Figure 2.**

(A) Phylogenetic tree of GnRH paralogs in piranha, head-and-tail-light tetra, and other teleosts (Maximum likelihood). The number at each node shows the percentage of the bootstrap value for 1000 replicates. Scale bar represents 0.50 substitutions per site. (B) Genomic and deduced mature peptide sequences of wild type and KO *gnrh1* gene. Both 1-bp and 10-bp deletion mutation resulted in a frameshift and a premature stop codon (asterisk). In all mutations, it is expected that functional GnRH peptides are not produced. (C) Detection of *gnrh1* mRNA was failed in various Characidae fish cDNA. Degenerate primers that amplified piranha *gnrh1* failed to amplify *gnrh1* of neontetra (lane1), head-and-tail-light tetra (lane2) and glowlight tetra (lane3). Note that the bands observed in lane 2 are nonspecific amplifcons. M, DNA markers (bp).

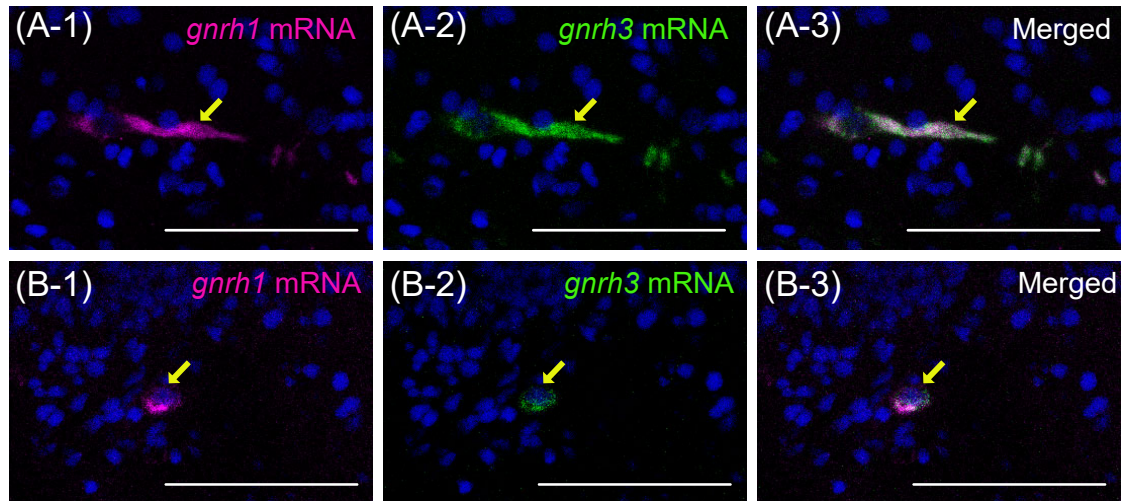

**Figure S4. Other representative sections of double-labeled *in situ* hybridization of *gnrh1* and *gnrh3* in piranha POA, related to Figure 1.**

(A, B) Double *in situ* hybridization indicates that co-expression of *gnrh1* and *gnrh3* is observed in many *gnrh*-expressing cells in POA. Magenta signals in (A-1), (A-3), (B-1) and (B-3) show *gnrh1* mRNA, and green signals in (A-2), (A-3), (B-2) and (B-3) indicate *gnrh3* mRNA. Nuclear counterstaining using methyl green is shown as blue signals.

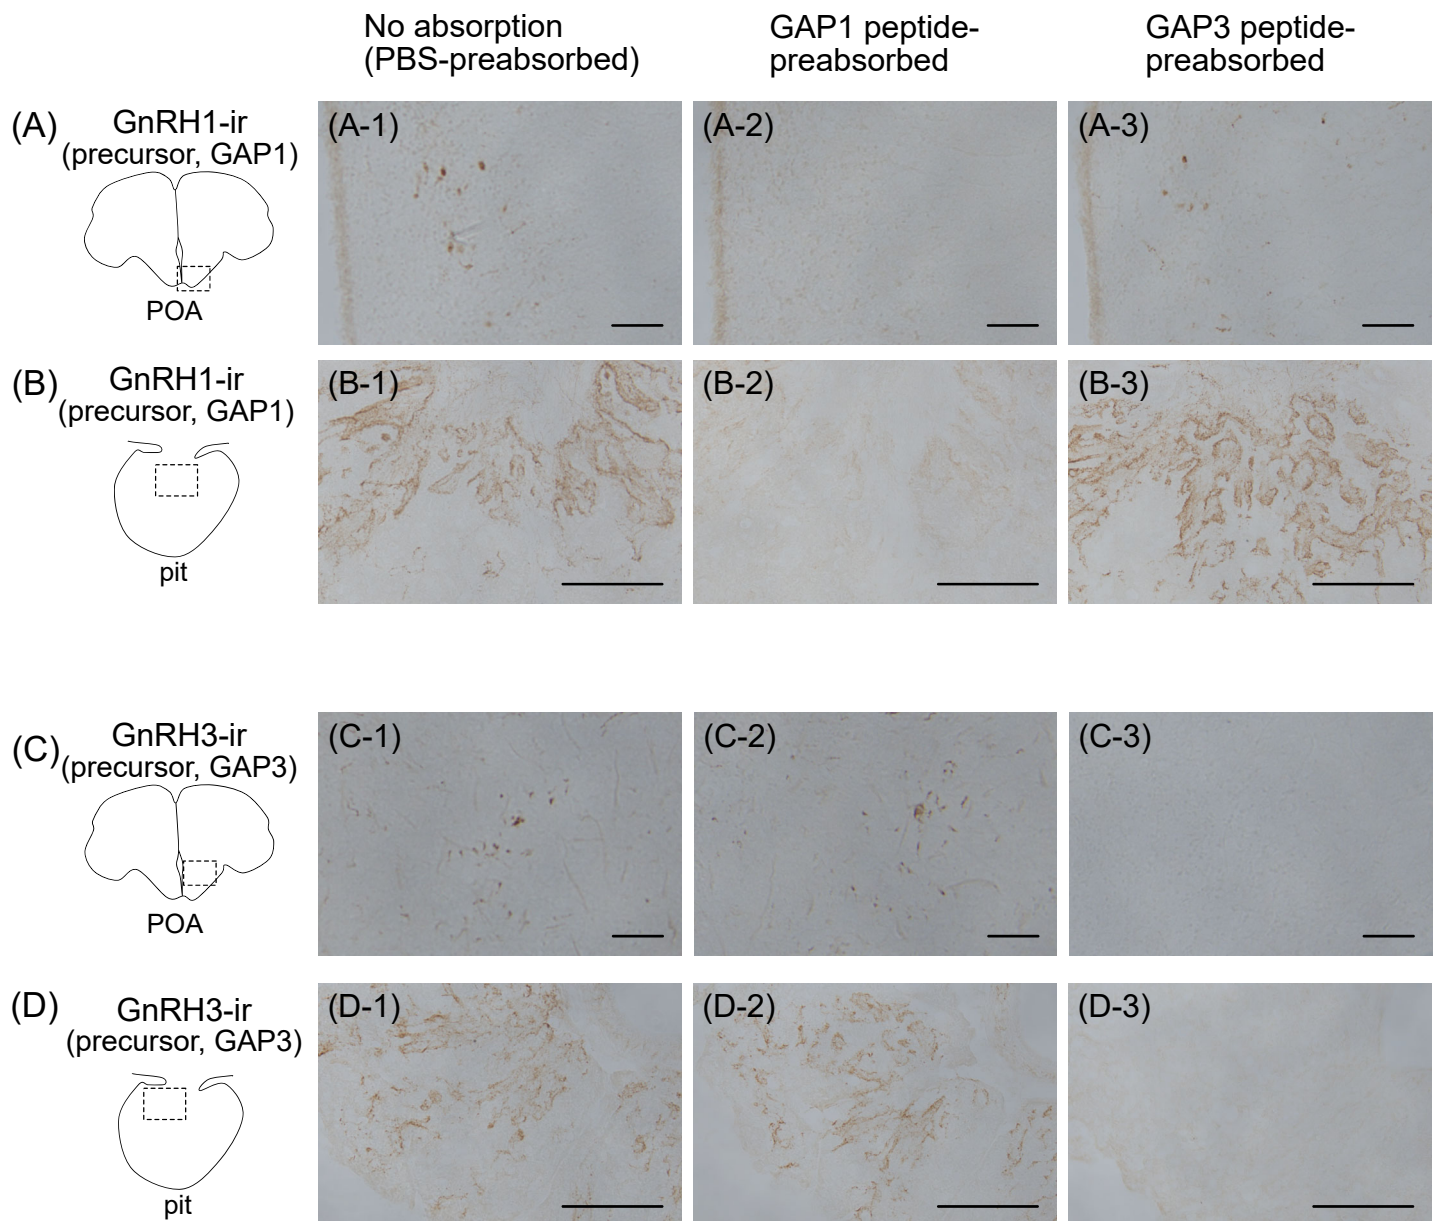

**Figure S5. Specificities of produced GnRH precursor antibodies, related to Figure 1 and Figure 2.**

**(A, B)** Immunohistochemistry for GnRH1 precursor of transverse section of piranha POA **(A)** and pituitary **(B)**. Immunoreactive cells and fibers are labeled using a GnRH1 precursor antibody **(A-1, B-1)** and are not labeled with a GnRH1 precursor antibody preabsorbed with GnRH1 precursor peptides **(A-2, B-2)**. **(A-3, B-3)** In immunohistochemistry using a GnRH1 precursor antibody preabsorbed with GnRH3 precursor peptide, immunoreactive cells and fibers are labeled. **(C, D)** Immunohistochemistry for GnRH3 precursors shows that immunoreactive cells and fibers are labeled in the POA **(C)** and the pituitary **(D)** when preabsorbed with PBS **(C-1, D-1)** or GnRH1 precursor peptide **(C-2, D-2)**, but are not labeled when preabsorbed with GnRH3 precursor peptide **(C-3, D-3)**. Scale bars, 100  $\mu\text{m}$ .



|      |                                                                                   |      |
|------|-----------------------------------------------------------------------------------|------|
| 1    | AATTCCTTCTAGTCATCGTAGTTTTAAGACTGTAAAGTTTGGTCAGTAGGAGGTGGCCAAATCTGCTCTGTTTTTTCTC   | 80   |
| 81   | ACGGATTGGAATAAGCGTCAGTGGGTTTTTGGCATTGATACTGCTACACAAAACACAAATCTGTGTACATATGAAGAA    | 160  |
| 161  | AAAGATTGGACATGGGCCACTTTTACCTGCAGTGTGAATGTAACCTTATGAATCTTTAAAAAGCTCTCTTGCGTAGTAACA | 240  |
| 241  | GTAGCCTTGCTGTACCAGTACATATAGATCGGAGCATTGAGTTTGGGTTTGCCAATGACTGGCAGTTAATGCATTCGTG   | 320  |
| 321  | TTTCAGAGTTCTGGAATATTTTAGGAGTTTAAAGACTCTGAAATTTGGTGAATGTTGAAGTTAGGCAGAGCAGCCTTTCT  | 400  |
| 401  | GAGGCTTTTCTTGATTTTCAAGGGCACGTCAGGTTCAAGCCATATTATATCGTGCATGCTTAAGGAGGCAAAAT        | 480  |
| 481  | CTTGATATCTGTGTAGCATGAAAGAAAAGGGTGTGGATCCATAACCTCATATTTCTATACAAATTTCTAGGTTAG       | 560  |
| 561  | GCATGCCAGTTAAATATGCAATATAAATGTATTAGTGTCTGTTTTGACGTTTTCTGTTGTGCAAATGCAAATGACAGC    | 640  |
| 641  | AGTTTGTATCACTTTCTGTTTGTGTTGCTGTTTGTCCAAATCTACCTCTCACTTAGGATACTGACCGTTTTTTTTTTTT   | 720  |
| 721  | TTTTTTTTTTTTTTTTTGGCTGTTTTGTGAGTTTGGGTTTTTTTTTGGCCATTGTCAATGCTGTTCTCTGGATTCTCAT   | 800  |
| 801  | GCGAAGGCTTGTGCTGACTGTGAGTGATAGACGCTAGGATGTTAAATGAAAGATAAATTACCAAATGCTGTTGTATTT    | 880  |
| 881  | TTGAGTTATGCACACCCTGTGGCTATCAACTCGAGGATAATGATACTAGCCTATTAATTAATATGCAGAACAGTTCACC   | 960  |
| 961  | AGTAGCAAGACAACACTGCTTTGAATGATGATTTGTGTATTGTGTGACTGTTTCTCAACAGATATTTCTTAGTTTTTTT   | 1040 |
| 1041 | CTTGACATTATTAGTAGTGAACCTACTAATAAAAATGTCTTTGTTTCAGGCAAAACCAAAAAGCTTTGAATGGGGTGCTTA | 1120 |
| 1121 | CCTGTCAGATAGAGTGTCTCCCTCAGCGTAATCGCATAAAACCGTTCCTTGTGATTTGACAGGCCGTGAATCATTGTCA   | 1200 |
| 1201 | CTGACCCATTAGCATCAAGTCGTGGTCATCCGTATGCCACTTAGCCTTATTTATATTGTCCACGCTTTGTCTGTAAG     | 1280 |
| 1281 | CCTATTACAATAATATGTTTGTGTAGTGTGTTGCTGATTTCTTACCTACTGCCCTGCAGTTTCAATGCTTTCAATGTT    | 1360 |
| 1361 | AATATTATTTCCCATGGGGTACAGCTGCTTGTATATAAGAATGCATGCTGGAGACACTTGTAAAGCTTTTGCACACCC    | 1440 |
| 1441 | AATCACCTGCAGACAAGGGTACGCTCCCTCTAAAACCCACCCAGATGTCTTGTCCAGGTCTAGAACACGAGCAAAACA    | 1520 |
| 1521 | AGTTAGCTAGCAAAACGCTATCGTTAGCTAATTAACCTTGTAAACGCTTGCCGGGGCTCATCTCTTTTTACTGTGTG     | 1600 |
| 1601 | TTCTCCACACTTGTGCTCACATCTACATGCTTATTTGGAGTTAATATGGGGACTTTTATGTTACATCCATGTGCTAAC    | 1680 |
| 1681 | AACAGGCTTCTTATACTTTGGACAGCAAACGCACAAAATAGCAAGTCACTTTTTTATTTTTATTTTTTGTAGCTTGT     | 1760 |
| 1761 | TTCCACCAAAATATGCATGTTCCAAAATTTCTGTAGTTGTCCTTAATGTTCTCGTTACGAGATCATGCTGGCCC        | 1840 |
| 1841 | CCATGCGAGTGTTAATATCAGCTGGATTATTGCTGTGTGTTAAAAACTAAGTCAGACCTGTTTTTGGCAATAGCTTAA    | 1920 |
| 1921 | AGTTAATGGGATTAATATGCTGTTACTTCTGTAGCTATGTAAATGTAGGTACTCTGTTGAATGAAGGCAATCAAAGC     | 2000 |
| 2001 | AGACTTCTGCACTTAAGTGTGAGTCTAAATTTACTGGACCCTTGACGAAAGGGCCAGGCTATTTATGTATGTATGTTA    | 2080 |
| 2081 | TGTATGTAATCAGGCTATATTTATGGCAGGTGAAAAAGAGATGCTCTACTTTCACCTCACTATCTTGCACCTACTAT     | 2160 |
| 2161 | TACGGAAGTGTATTTCCATAAACAGACTGTTATAATCAAACCTGCTTGTGTCTTCATTTTCCCGTTTGTGTTTTGGT     | 2240 |
| 2241 | CTTTAATCTTGTGTTTGAAGTGAACACTCCAACCTGTACGAGTGACGCTCAGAACAATCATTCAAACCTGCTCCATTAA   | 2320 |
| 2321 | AATGCTTCAGTTATTCTAATCAGGTATTTTGACGCTGATAAACGCTGCAAGCGTTACAAAGAAAGGGGAACCTCAGTCGG  | 2400 |
| 2401 | AATTTTGGCCCTGACTGTTGTAAGAGTGTCTTGGCTGGCCCAAGAGCTGTTTATGATCCCAAATCCCAACTTAAAGGG    | 2480 |
| 2481 | GAATAATTGAGCCTTTGAGTGTAAAGCAAGTCACTTGTAGCAGTTTGTATGCGAAACGTTCAATTGAGAGAACTCCCT    | 2560 |
| 2561 | CAGATTTCTTTATGGTGGTGATTGAAACCAAGGATCACAGTGTCTACAGCATAAAATCCACTTTTTTACTATCCAAAATGA | 2640 |
| 2641 | ACTGTACACAAGTTTTTTCAGACATTTTATGCCTAATTTGCATAATCACAAATTTTAAAAAGGCATCAGCCGTGCTTCAGA | 2720 |
| 2721 | ACCCTGTGAGCAAGCTTAAAGATTTGATACATTTTCTGGATTGAATCATTTACACCAAACCACTCTGAAGGACTATT     | 2800 |
| 2801 | TACAGCTTAACCATTTTATTATGTAGAAAAATAGACAAATCAGTGGAAAGTCCAATCCAAAAAAGGTTTCCAGCTGGCTGG | 2880 |
| 2881 | GGACTTTCAATCATTCAACAAAGCAGGAGCTTGTGCTCAATGTTTGGAGACTGAGCTCCACTGATTAAGGTTGCCGTGT   | 2960 |
| 2961 | GTAAGATGTAGTGACATCTGGTGGTGGGTTGCAGATTGCAACCAGCTAAATATTACTCTTAAATATCAATGTAACTTTT   | 3040 |
| 3041 | GTGCTTTCATGTTTTCGCTTCTTGGATGATGATCCACCCTCTTTGCTTTTTCTGTGCGCAAAATACGATCCCTCCATT    | 3120 |
| 3121 | TAATAAAGTTTTGGTCTTCAAACTTCTCTCAACACAATGATTAGCCAGCTGGCAGCAGCCACTGATTTCTTCTCCAC     | 3200 |
| 3201 | GTCTGTACCACTAAATCAGCAACATAAACACGGCAGACGCTTGGCCTACTGTAGAAACATGGCAGCGCAGCATGGCTGT   | 3280 |
| 3281 | TGGAAGAGGACCCACTCCCTGTAGATTTTAAAGGGCTCATTCTAAGTGAACGAAAACACAACAAGCTATAGTTACAGGTGA | 3360 |
| 3361 | TAACGCACTAATGAAAACAGGGTTTTGTATACTATATTTTGTCTTCCCAATAGACTTCTTACACTGCACCTTAAAC      | 3440 |
| 3441 | GCTCCAGCTTATTTGGAATGAAAATTTGTAGCCACACCAGCTCTGCGGATAAAATGTACTCTCTGTTTGTAGATGGTGA   | 3520 |
| 3521 | AACAAACTATAGACCAAAGTGCACAGAAAGTAAAGACATATTTACTTACAATGTATCCATCCATCCATCCATTTCT      | 3600 |
| 3601 | AAGCCGCATCTCCGTCAAGGTCGCGGGGGGAAGCTGGAGCCTATCCAGCAGTCTTGGGCGGAAGGCAGGATACACCT     | 3680 |
| 3681 | GGACAGTCCGACGTCATCACAGGGCATAACACAGACAGACAGTCACTCACACTAGGGACAATTTAGCACACCCA        | 3760 |
| 3761 | ATTGGCTGACTGCATGCTTTGGACTGTGGGAGGAAAGAACCCTGGAGGAAACCCAGCAGACACGGGGAACATCCAA      | 3840 |
| 3841 | ACTCCACACAGAGAGCCCGGTCACCCGCGGGGGAATCGAACCCAGGCCCTCTTGTGTGAGCGACAGCGCCACC         | 3920 |
| 3921 | GTGCGGCCCTTACTTACAATGTTTTTTTTTTTTTCTACTTACAATGTAGAAAATAAAAAAACAACATAGGCCATAGAATT  | 4000 |
| 4001 | GTTTTGAACTCAGTCTGTTGTCTTGAATCAACCAGAATAAAGCAAAAAGAAATTTCAAACCTTTTGCAAAGACTTAGC    | 4080 |
| 4081 | AGAAAGTATAGTGTATATTAGAAAGCCTGGCACAACCTGCACCTCTGGTCAATCACTTGGAGTTCAAGTACGTTGTA     | 4160 |
| 4161 | CTCTTCTCATTCACTTTGGAGCACTTTAAAAACTTCAAGCATTAGCCTTCTCTGAGTAATCTTTAAAAAGGCTCAGTG    | 4240 |
| 4241 | GGAAGTGTCTGAAAGGTGCTTACTTCCGTATCCTTTTCTGCTCTTAGCCCCCTGCAGTGAGGGGCTGGAGAAGCGA      | 4320 |
| 4321 | TTGCGTGAGACGAGCAAGAGCTCTAAGAACAATAAAGCTGAGAGCAGGAGTGTCCAAACCTGAAACCAGAACGGTGA     | 4400 |
| 4401 | CGAGAAGCAGAAGCTTCTACTGGTCAGCTAAAGGTAAGTCAGATCCAAGTACGTGCTTCTGTTGGCACACTTAGAGCA    | 4480 |
| 4481 | CTGGTTCAAAACCAGTCCCTCAGGGCCTCTGGATGTTCCAGGTTACTGTAGCAGAATACCTGATGAAAGGTTTAAAAACTA | 4560 |
| 4561 | ATGCCTTTGAGCAATATTTAGCAGATCAGTGTCCACAGTTCAAAGAGCTTAGACTGCTTTTGTGGACAGTTCTGATCC    | 4640 |
| 4641 | TAAATTTTAAAGACTTTTATTTTAAAAAGGGGTATAGGTTAATTTGAAAAGCTAACATCCAAATTTATCTTGAAAGCC    | 4720 |
| 4721 | ACAGTTTCCCTTGATATCCCTTTGGTATCAAGGCTTTTATGTTGAAAAGCCTTATTTATCCCAATACCTGAGTATTGA    | 4800 |
| 4801 | GACTTTGGAAAGCTACAGTTTCTATGATATTTGGGCATCTTATTTTTTAAAAAATGATATTTAACTCAATTGAGTGG     | 4880 |
| 4881 | TTTTCAATGCTGAAGGTGGCTGTTTCTGTTGCTTTTTTTCAGGATGAAGACAAGCAGTGTCTCTTGTGGGTGATGATT    | 4960 |
| 4961 | TGTGTTGTTGTT                                                                      |      |

**Figure S6. Upstream sequences of piranha *gnrh1*, related to Figure 3 and Figure 4.**

The upstream sequence of piranha *gnrh1*, which was used for generation of transgenic medaka and zebrafish, Tg(*pngnrh1*:RFP).

|      |                                                                                     |      |
|------|-------------------------------------------------------------------------------------|------|
| 1    | TTTAAACAATCATTCTACGCACAGTGAACCTAAGTGTGTTTCTTAGAGATGAAGTGTGTCTCAGTTAACTGTTTAGT       | 80   |
| 81   | TATCTTGTGTTGTTGTTTTCAGTGAACCTGACCGCTGAGTGGAGCGCATTACAGACAAATTCAGTTAAACCGATTACGTTTTT | 160  |
| 161  | CAGTATTTAATTTGTCAAACGACGTACATTAAATTTTATAACACTTAATTTTTTTTATTTGAGTTATTTGTTTACCTGTG    | 240  |
| 241  | CACCAGTCATTAACCTCTGGAAAAATAAATCAAATCATTTCTCTGGTCTGAGTCTTCAACCACCCTCAGCTAT           | 320  |
| 321  | CCTGCAACACATTATTGTACAGTAAGAAGAAATCACAGAAATTACACATTTCAATTTAGATCTTTATTTGGTAATACAAT    | 400  |
| 401  | GTGCATATGTGTGTTGTGTGTGTGTGTGTGTGTGTGTGTGTGTGTGTGTGTGTGTGTGTGTGTGTGTGTGTGTGTGTGTGT   | 480  |
| 481  | GTGTGTGTGTGCGCATGCATGTTGAGTCCGAAAGAGGCAAAGCGGTCCACCTTCACATACTGTTTACATAGTATAATAGT    | 560  |
| 561  | ATACATTTAAAATAACCTAGGATATTGCTATATTGCTTAAAACTGTACTTACATCAGAGAGTGAGGAAACCATGCTAC      | 640  |
| 641  | TCTGTGATGCTCCGTGCAGAGGGTCTTTGACCTAGTAGACAACCCATCTCCATATGAATGGACTGTAAAAAGGAAAAAAG    | 720  |
| 721  | TTGAGGGTTCCATCTAGTGACAAGAGAATAGTGCCTCAGTGGCAGTTTAGTACCTTTATTTATTAAGCGTACAATCACA     | 800  |
| 801  | GAGCTGTATCCTAAGAAGCATGACAGAAGGATTATGTTCAATAAGAATAAAAGATGAGCGCAGACACATAAAGAAGTACA    | 880  |
| 881  | AAGATGACGCGACTCTCTGAAATGTGCTACCACTCATTCCAACATTCAAAACAGAACAGCACCCCTGCTGTGAGTA        | 960  |
| 961  | TCAATGCAAACCCAAATCCTCATTTCATTACAAAAGTAGTTCACCTCAAATGTCACAATAGTCAGTTACTCAAATCTG      | 1040 |
| 1041 | CACAAGAAGATTGGCAGGAATTTGTGAATTCAGGCTAAGCGTGAAGTTACTTTTCATGCACGTGTTAGTGATAAAGTTTCT   | 1120 |
| 1121 | GTGCAGGTATATTTCCCTCAAAGGTACAACAGTGGTTTTAAGGTCCAATTTGTGAACCTTAAATAAGTTTTTCCGGCTG     | 1200 |
| 1201 | AAAAATACATATTTTACGTTTTTCATAAGCTAGTGTCTTAAAACAGAACAAATAAAATAAAGCCTGGCGATGAGACGGCG    | 1280 |
| 1281 | TGTGCAGAGTCAATACAAATATCATTTCAGTGTATTATAGTACAGTTATGAACCTGACTAAAGGCACAGAGATGTACCC     | 1360 |
| 1361 | TTGAGGGTTCCATCTAGTGACAAGAGAATAGTGCCTCAGTGGCAGTTTAGTACCTTTATTTATTAAGCGTACAATCACA     | 1440 |
| 1441 | AATAAGAAAAGAAAATTTCTCAAAAAGTTTAGAACTGGTCTTCAACATTCATAAAACATAATAAAGAAGAGCATCTC       | 1520 |
| 1521 | TAAACATCTCACTGCCAGTAACAAAGTAGAGATGGACATAATCCCCATCACAGCACAGAAGAAACATTCATTAATGTTG     | 1600 |
| 1601 | AAACACATTTTACATGAATTTACATATTTCTGTCTGGTCTGATCTGCTACATTAACAGGACACTATAACAGACAAG        | 1680 |
| 1681 | ACTGCGTGGTCAAGTAAACCCCTACTTAAATAATTTAGTCTGAAATACAAAAGTTTACCAAATGAACCTGATCATA        | 1760 |
| 1761 | ATAAAGACTACTATCACTATATCTATGGGTACATCTCTTGCCTTTGGGCTAGAGCCATCAAATTCAGATATGAGA         | 1840 |
| 1841 | AGCATGCCGATGGGACGACAAAATGTTGGGAGTTTTGTAGCTCAGATACCAAGCTACTCACTAGGGACCTCAGTACAAAT    | 1920 |
| 1921 | GGGCTGAGTTTTCTTAGGTTATAGAAGTGTGAATAAAACTTTGGACCTGTGAGTGGGCCCTGATTATTTAACGCATTA      | 2000 |
| 2001 | AGTGACCAATCATGTGTGAGATTGGGGCCGAAAGGTGGGTGGGAGTATCACATATTAATAGGCCCTTTTACCTTCC        | 2080 |
| 2081 | CACATTTTTTCTGCTGGGCGTGAAGCTTGAAGCCTCATGTCAATTTTCTGGTGGTTTTGCTCTGATGACAAGCAGAGCGAA   | 2160 |
| 2161 | ACAGGTTTAAACAAAGGAATAAACTTAAAAGAACCTCTCTGCAACATTTCAACACTGCTGACTAATGTTAATGTGCAGTT    | 2240 |
| 2241 | TATGCTTTAAAGTTTTAAAGAGTTTTCAATTTCTCCATCAATAACTATCAGTATCTGAGAGAGTAAATGTTACAGGGAA     | 2320 |
| 2321 | CAGAGGTTCTGTTCACTGGAGTCTGTGCTGTGTAATATGCCTACAATATCATTACGGACCATATAACCCAGAAATGCCCC    | 2400 |
| 2401 | CTGATGTGCTGTTAGCTTTTTGCCATTTAGTATATTGTTAGCGAGCTGTTTCAATATATCCAGTTTACATGGCTAATCC     | 2480 |
| 2481 | AGTGTTTTGTGTTACAGTATTTTTACCTCCATTGATTTATCGCTCTGTAGACGTTAGCTGACATTACTCTAATAGTTGTG    | 2560 |
| 2561 | AAGGAACTTTGTCAACAAATCATTACATTGTTATTTAGTTTGGACTCCCACACGGTTGTGTTGATTTCATCTATGAC       | 2640 |
| 2641 | AAAGATAAAGTACTCACCTTCTGTGGTGAAGTACTGATTTTCTGAGGTTAGTAACTGTCTGAAGGCAATAGCA           | 2720 |
| 2721 | TATCTTGTCTTACACATCTTTTTCTTGTGAAAAGGGTCTATGGAAGTCCCTGCATGGTCTAGCTGGCTTGGATGGCCCAA    | 2800 |
| 2801 | AAGACAAATCAGAAATCAACAAGAACATCTCTACTACTCTTATGGACAGTCTGAGCTTGGAGTATCCCAGTACAAAA       | 2880 |
| 2881 | TACTGGGGTGTGGCCAGACACCACAGGCCCTCTACCAATGTGACTCTGCCCCCAATAGTAAAGTCACTGATCTC          | 2960 |
| 2961 | ACTCATCTTCAGATCACCATTTTTCTTCAAAAAATTAAGTACTGATGACGAGCGAGGACATTTAGCAAGTCTTGTGTTAG    | 3040 |
| 3041 | CTAACAAAGACAAAACAGTAGAAAAATACAAATATGTAACAATGTTACAATAACATTAAGTATTTGAGGTTTGTG         | 3120 |
| 3121 | TTTATATGTGGTTATGGGTGAAATCCACTATAGATCAAACACTCTAACGTTTAAATGATAACAAAGCCATAAATGCTAAA    | 3200 |
| 3201 | TGCTTCTTTAGCATGTGCTAATCTACACTCCAGGCATATAGTAAAGATAAGCTTTATTAAGCTCTAGCAGCTGTGTT       | 3280 |
| 3281 | TTCTTTGCTACTGTGAGCTGTTAAAGCATTAAAAATAAAGCTTTTGTACATTAACCATCAGAGATAATCTCTTGTGTGA     | 3360 |
| 3361 | AACTAAATCCTGCATTAGCATTATGCTCTGGAGACTCTCGAAAACTTAAGTGTCTGTTGAAAAGCTCTGGGCTGTGA       | 3440 |
| 3441 | CTCAGTCTGAGTAGCGGTATAAAGCGAATAAAATAGTTCTTGTCTGTTGCGCAAC                             |      |

**Figure S7. Upstream sequences of piranha *gnrh3*, related to Figure 3 and Figure 4.**

The upstream sequence of piranha *gnrh3*, which was used for generation of transgenic medaka and zebrafish, Tg(*p<sub>gnrh3</sub>:GFP*).

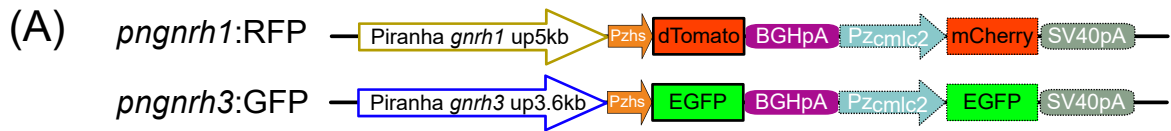

(B) Tg (*pngnrh1*:RFP) zebrafish

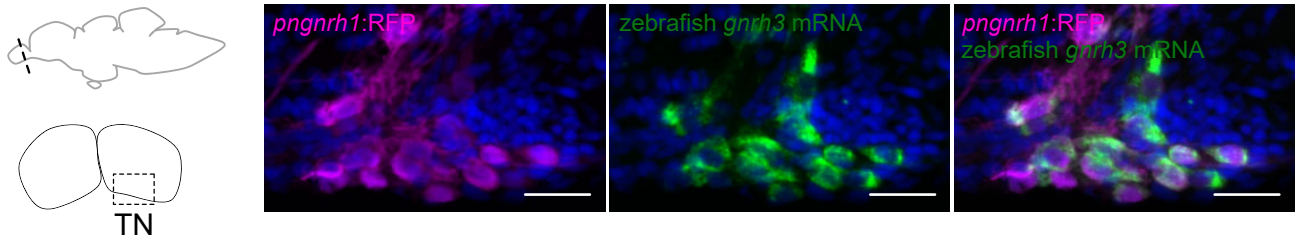

(C) Tg (*pngnrh3*:GFP) zebrafish

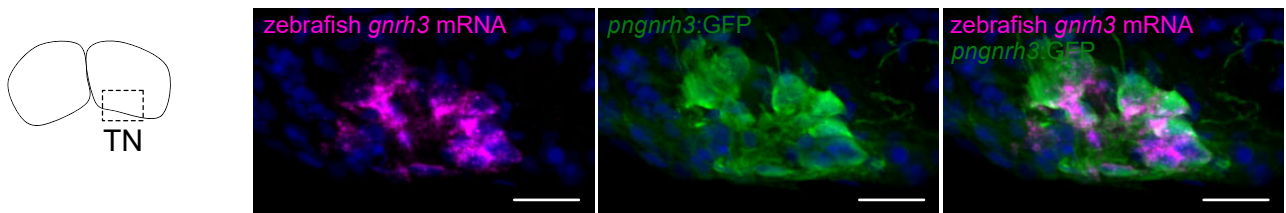

(D) Tg (*pngnrh1*:RFP; *pngnrh3*:GFP) zebrafish

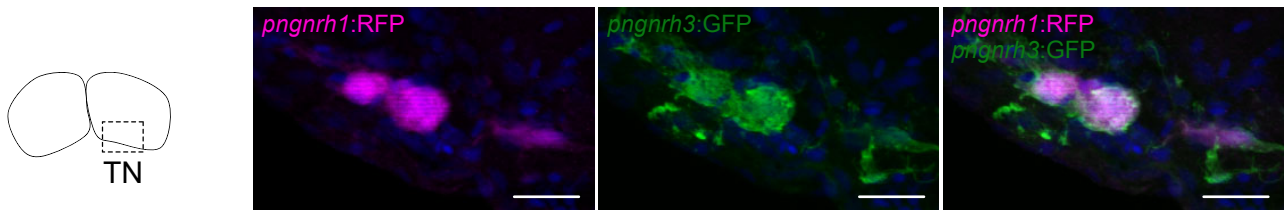

(E) Tg (*pngnrh1*:RFP) medaka

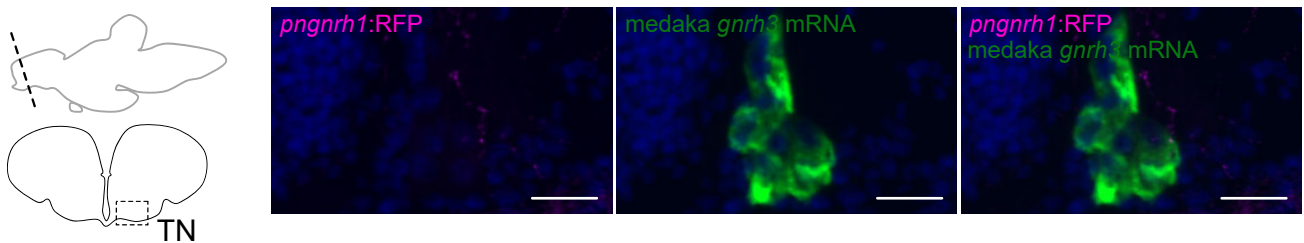

(F) Tg (*pngnrh3*:GFP) medaka

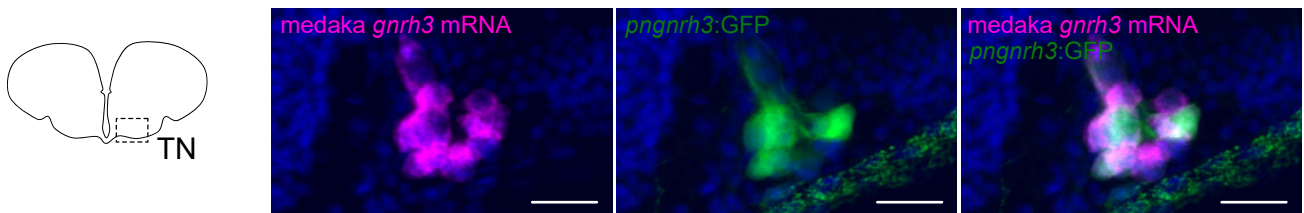

(G) Tg (*pngnrh1*:RFP; *pngnrh3*:GFP) medaka

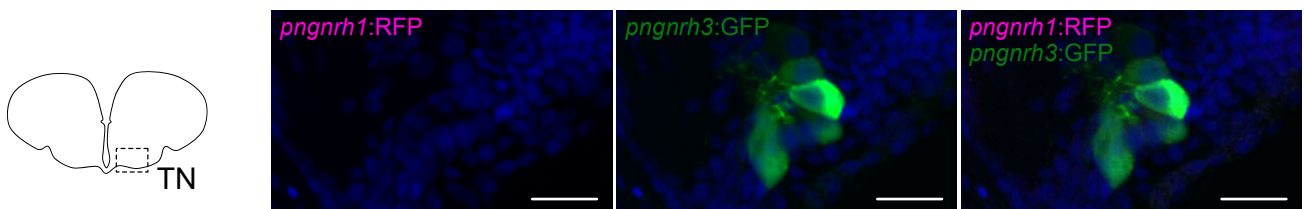

**Figure S8. Examination of enhancer activity of piranha *gnrh1* and *gnrh3* (*pngnrh1/pngnrh3*) in the terminal nerve (TN) of zebrafish and medaka, related to Figure 3 and Figure 4.**

(A) The constructs used to generate transgenic zebrafish and medaka. Both constructs examine the enhancer activity of piranha *gnrh1* or *gnrh3* 5' flanking regions by using a basal promoter (zebrafish heat shock promoter, Pzhs) and a fluorescent protein (dTomato or EGFP). For screening of embryos, cardiac myosin light chain 2 promoter of zebrafish (Pzcmhc2), mCherry or EGFP and SV40 poly(A) signal were inserted downstream of reporter construct. (B) In Tg (*pngnrh1*:RFP) zebrafish, *pngnrh1* enhancer-induced RFP expression is observed in GnRH3 neurons (*gnrh3* mRNA-expressing neurons) in the TN. (C) In Tg (*pngnrh3*:GFP) zebrafish, *pngnrh3* enhancer-induced GFP expression is observed in GnRH3 neurons in the TN. (D) Analysis of the double transgenic zebrafish, Tg (*pngnrh1*:RFP; *pngnrh3*:GFP). In Tg (*pngnrh1*:RFP; *pngnrh3*:GFP) zebrafish, some of the neurons in the TN express both RFP and GFP suggesting that *pngnrh1* and *pngnrh3* enhancers are activated in the same neurons. (E) In Tg (*pngnrh1*:RFP) medaka, *pngnrh1* enhancer-induced RFP expression is not observed in the GnRH3 neurons (*gnrh3* mRNA-expressing neurons) in the TN. (F) In Tg (*pngnrh3*:GFP) medaka, *pngnrh3* enhancer-induced GFP expression is observed in the GnRH3 neurons in the TN. (G) In double transgenic medaka, Tg (*pngnrh1*:RFP; *pngnrh3*:GFP), some of the neurons in the TN express only GFP suggesting that only *pngnrh3* enhancers are activated in the TN. Scale bars, 100  $\mu$ m.

**Table S1. The sequence of primers used in this study, related to Figure 1 and Figure 2.**

For full-length cloning of piranha *gnrh1*

5'-CTSYCAGCAYTGGTCITWYGG-3'  
5'-ACTGGTCNTWYGGICTIMGICCIGGIG-3'  
5'-TACTGCGTGGTCACTTTCAGCTTTCGG-3'  
5'-TGCAGCCGCCTGAAAAGTGCCTGTC-3'

For full-length cloning of piranha *gnrh3*

5'-ACCCTSTSYCARCAYTGGTCITAYGGITGG-3'  
5'-AGCACTGGTCIYAYGGITGGYWNCCIGGIGG-3'  
5'-CARCAYTGGTCITAYGGITGG-3'  
5'-TATCTGCTGCAGTGGAGACTCCAGG-3'  
5'-GGGGCAAAGCCACAACAGCATCACC-3'

For cloning of head-and-tail-light tetra *gnrh3*

5'-CTSYCAGCAYTGGTCITWYGG-3'  
5'-ACTGGTCNTWYGGICTIMGICCIGGIG-3'  
5'-CTACTTTAGCGCTTCAGAATCTTCCTCA-3'  
5'-TCTCCAGCGTCCATCATTCTGAA-3'  
5'-GTGATCTGCTGCAGTGGAGAGTT-3'

For genotyping of piranha *gnrh1* KO

5'-GGCTGTTTTCTGTTGCTCTTTCAGGATG-3'  
5'-TACCGCCTGAAAAGTGCCTGTCA-3'

## Supplemental References

- S1. Chehade, C., Amaral, F.G., Branco, G.S., Cassel, M., De Jesus, L.W.O., Costa, F.G., Bordin, S.A., Moreira, R.G., and Borella, M.I. (2020). Molecular characterization of different preproGnRHs in *Astyanax altiparanae* (Characiformes): Effects of GnRH on female reproduction. *Molecular reproduction and development* 87, 720-734.
- S2. Bogerd, J., Ka Wan, L., Janssen-Dommerholt, C., and Goos, H. (1992). Two gonadotropin-releasing hormones from African catfish (*Clarias gariepinus*). *Biochemical and biophysical research communications* 187, 127-134.
- S3. Zandbergen, M.A., Kah, O., Bogerd, J., Peute, J., and Goos, H.J.T. (1995). Expression and Distribution of Two Gonadotropin-Releasing Hormones in the Catfish Brain. *Neuroendocrinology* 62, 571-578.
- S4. Torgersen, J., Nourizadeh-Lillabadi, R., Husebye, H., and Aleström, P. (2002). *In silico* and *in situ* characterization of the zebrafish (*Danio rerio*) *gnrh3* (sGnRH) gene. *BMC Genomics* 3, 25-25.
- S5. Steven, C., Lehnen, N., Kight, K., Ijiri, S., Klenke, U., Harris, W.A., and Zohar, Y. (2003). Molecular characterization of the GnRH system in zebrafish (*Danio rerio*): cloning of chicken GnRH-II, adult brain expression patterns and pituitary content of salmon GnRH and chicken GnRH-II. *General and comparative endocrinology* 133, 27-37.
- S6. Hildahl, J., Sandvik, G.K., Edvardsen, R.B., Fagernes, C., Norberg, B., Haug, T.M., and Weltzien, F.-A. (2011). Identification and gene expression analysis of three GnRH genes in female Atlantic cod during puberty provides insight into GnRH variant gene loss in fish. *General and comparative endocrinology* 172, 458-467.
- S7. Okubo, K., Amano, M., Yoshiura, Y., Suetake, H., and Aida, K. (2000). A Novel Form of Gonadotropin-Releasing Hormone in the Medaka, *Oryzias latipes*. *Biochemical and biophysical research communications* 276, 298-303.
- S8. Karigo, T., Kanda, S., Takahashi, A., Abe, H., Okubo, K., and Oka, Y. (2012). Time-of-Day-Dependent Changes in GnRH1 Neuronal Activities and Gonadotropin mRNA Expression in a Daily Spawning Fish, Medaka. *Endocrinology* 153, 3394-3404.
- S9. Powell, J.F., Zohar, Y., Elizur, A., Park, M., Fischer, W.H., Craig, A.G., Rivier, J.E., Lovejoy, D.A., and Sherwood, N.M. (1994). Three forms of gonadotropin-releasing hormone characterized from brains of one species. *Proceedings of the National Academy of Sciences* 91, 12081-12085.
- S10. Gothilf, Y., Muñoz-Cueto, J.A., Sagrillo, C.A., Selmanoff, M., Chen, T.T., Kah, O., Elizur, A., and Zohar, Y. (1996). Three Forms of Gonadotropin-Releasing Hormone in a Perciform Fish (*Sparus Aurata*): Complementary Deoxyribonucleic Acid Characterization and Brain Localization. *Biology of reproduction* 55, 636-645.
